# Supplementary material
Source: bioRxiv or medRxiv preprint supplement (https://medrxiv.org/highwire/filestream/87683/field_highwire_adjunct_files/0/2020.06.24.20131185-1.pdf)
Supplement: Supplementary file [file 2020.06.24.20131185-1.pdf]

19 June 2020

**TO:** The medRXiv Review Team

**RE:** Ethics Review MS ID#: MEDRXIV/2020/131185

**MS TITLE:** Sentinel Coronavirus Environmental Monitoring Can Contribute to Detecting Asymptomatic SARS-CoV-2 Virus Spreaders and Can Verify Effectiveness of Workplace COVID-19 Controls

To Whom It May Concern:

I am the Compliance and Ethics Officer for Eurofins Viracor, Inc. and I am writing to explain the ethics review of the study reported above.

Our laboratory conducted the testing related to the above referenced study. Prior to initiation, I reviewed the study set up and associated documentation. We required informed consent for each participant. All participants were employees of Eurofins, participation was voluntary, and each participant was required to read and sign a consent that included notification that the study would be submitted for publication.

Based on the study set up, I determined this met our ethics and privacy policies.

Best regards,



David C. Drovetta  
Director Regulatory Affairs and Quality Assurance
